# Supplementary material
Source: Springer Nature journal article supplement (https://www.springermedizin.de/resource/supplementary/12889_2014_7100_MOESM2_ESM.pdf/9499856)
Supplement: MOESM2 [file 9499856]

**Number of samples influenza positive**

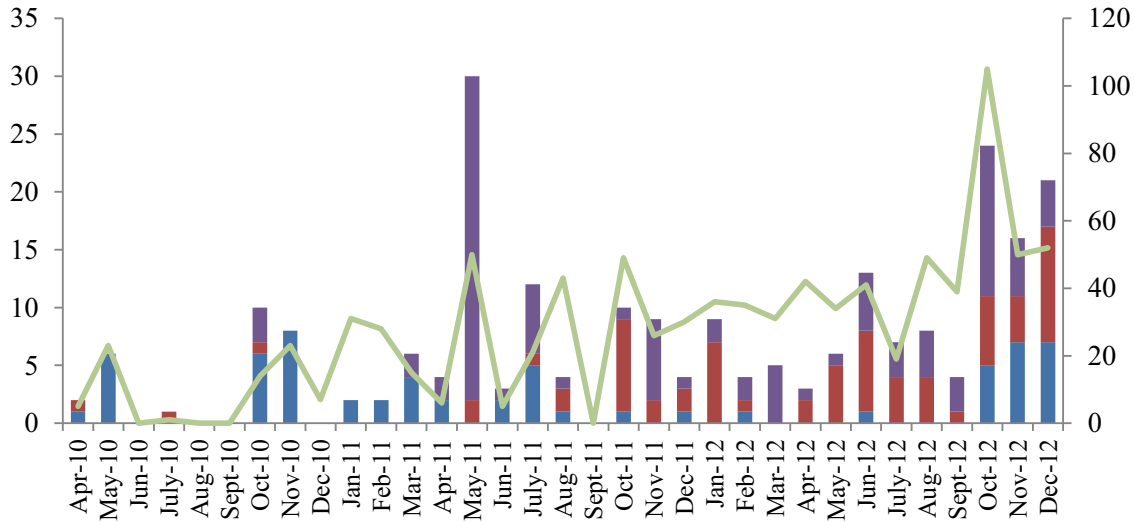

**Number of samples collected**

■ A(H1N1) pdm09 ■ A/H3N2 ■ Influenza B — Number of samples collected
